# Supplementary material for: Computational and transcriptional evidence for microRNAs in the honey bee genome
Source: PubMed Central journal article supplement (PMC2394756; doi:10.1186/gb-2007-8-6-r97), 2007-06-01
Supplement: gb-2007-8-6-r97-S8.pdf [file gb-2007-8-6-r97-S8.pdf]

C5152a  
dG = -18.30

|          |      |        |             |          |    |
|----------|------|--------|-------------|----------|----|
|          | 10   | 20     | 30          | 40       |    |
| GAUUUU-- | ACCA | A ua   | --  c       | CGAUUCUU |    |
|          | UCUG | CC uaa | auauguuugau | uc uggU  | \  |
|          | AGAC | GG AUU | UAUACAAACUA | AG ACCA  | U  |
| UGUUCAGC | CAAA | C C-   | UA^ A       | ACAAAAAA |    |
| .        | 90   | 80     | 70          | 60       | 50 |

C689  
dG = -46.80

|      |      |           |       |             |        |
|------|------|-----------|-------|-------------|--------|
|      | 10   | 20        | 30    | 40          | 50     |
| CAU  | UU U | a ua      | a     | AUGAUUG     | AA     |
|      | CGCG | GCC CUuca | uuccg | gugc uugcag | UUCG U |
|      | GCGC | CGG GGAGU | AGGGC | CACG AACGUC | GAGC U |
| CU-^ | UC U | G GC      | -     | CAAGAAA     | AG     |
| .    | 90   | 80        | 70    | 60          |        |

C5152b  
dG = -37.50

|             |      |          |              |               |    |
|-------------|------|----------|--------------|---------------|----|
|             | 10   | 20       | 30           | 40            | 50 |
| CAAACAAGUCG | GU U | -        | au           | u UU          |    |
|             | UCUG | U CCGUAa | gauauguuugau | ucuugguug uUU | \  |
|             | AGAC | G GGUAUU | UUAUACAAACUA | AGGACCAGC AAG | A  |
| AAA-----    | UG U | A^       | --           | U AA          |    |
| .           | 90   | 80       | 70           | 60            |    |

C3345  
Initial dG = -32.20

|            |     |                |     |             |    |
|------------|-----|----------------|-----|-------------|----|
|            | 10  | 20             | 30  | 40          |    |
| AGAUAAGC-  | -   | a cu           | a   | AUGU        |    |
|            | GUG | GUAUUUGuuuuaga | uuc | acgcuuu ccG | U  |
|            | UAC | CGUAAGCAAAGUCU | AAG | UGCGAAA GGU | C  |
| CUACUCCAAA | G^  | A UU           | C   | GAAG        |    |
| .          | 90  | 80             | 70  | 60          | 50 |

C5560  
dG = -45.90

|              |       |         |           |              |    |
|--------------|-------|---------|-----------|--------------|----|
|              | 10    | 20      | 30        | 40           |    |
| A-----       | CU    | Aa      | g         | -  UGCAU     |    |
|              | CUUAA | GGGGUCA | uugacucua | uagggaguc cC | U  |
|              | GAAUU | CCUCAGU | GACUGAGAU | AUCCUUCAG GG | C  |
| AGGCAACUUGCA | UU    | CG      | A         | C^ UAUAA     |    |
| .            | 90    | 80      | 70        | 60           | 50 |

C1504  
dG = -30.10

|   |              |         |           |
|---|--------------|---------|-----------|
|   | 10           | 20      |           |
| U | -A           | au      |           |
|   | CUGUCCUU--GC | UGCaggg | u         |
|   | GACGGGAG     | CG      | auguuuu c |
| - | \            | \       | -^        |
| . |              | 30      | gg        |

C5599  
dG = -23.80

|    |          |          |         |         |
|----|----------|----------|---------|---------|
|    | 10       | 20       | 30      |         |
| CA | AC AU--- | GGU A-   | .-UG    | g       |
|    | CCUG CUG | CCU UCG  | UUUUUGU | caggu a |
|    | GGAC GAC | GGA AGU  | AAGAACA | gucua a |
| G- | --       | GCGC AGU | AG      | \ --^ a |
| .  | 90       | 80       | 70      | 40      |

|        |       |
|--------|-------|
|        | 40    |
| acauuc | AA    |
|        | gcA \ |
|        | CGU U |
| CAGU-- | GA    |
| .      | 50    |

|       |        |
|-------|--------|
|       | 50     |
| g---- | agaA   |
|       | uucc \ |
|       | GAGG U |
| UAAAU | AAGA   |
| .     | 60     |

|       |        |        |
|-------|--------|--------|
|       | 60     | 70     |
| GGAC- | - A    | AGA    |
|       | CGG GC | CGUG G |
|       | GCC CG | GCAC G |
| UUGGU | A -    | AUC    |
| .     | 90     | 80     |
