# Supplementary material for: Computational and transcriptional evidence for microRNAs in the honey bee genome
Source: PubMed Central journal article supplement (PMC2394756; doi:10.1186/gb-2007-8-6-r97), 2007-06-01

A)

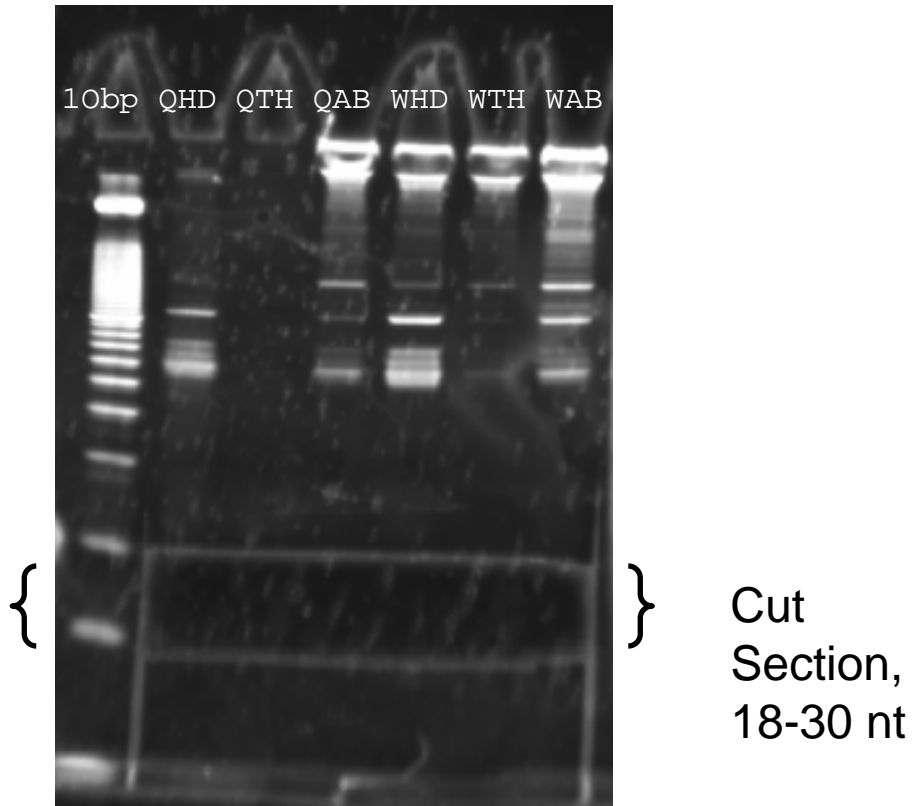

B)

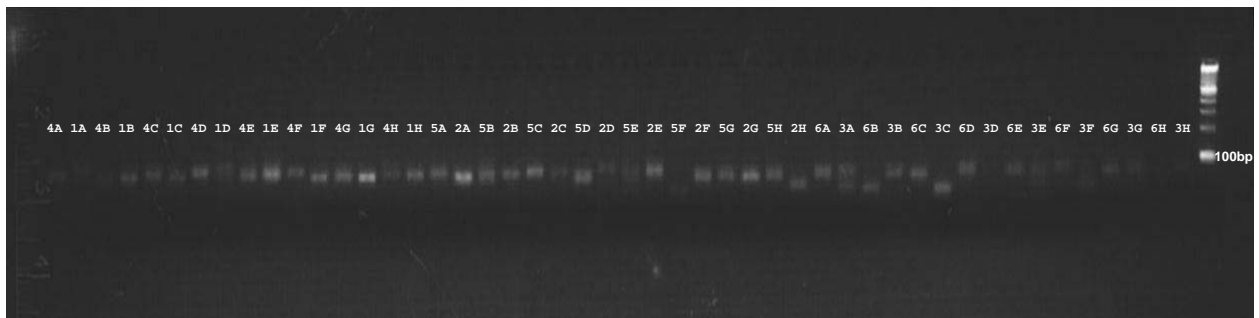

Supplement: gb-2007-8-6-r97-S9.pdf [file gb-2007-8-6-r97-S9.pdf]
