# Supplementary material for: Computational and transcriptional evidence for microRNAs in the honey bee genome
Source: PubMed Central journal article supplement (PMC2394756; doi:10.1186/gb-2007-8-6-r97), 2007-06-01
Supplement: gb-2007-8-6-r97-S10.pdf [file gb-2007-8-6-r97-S10.pdf]

Fig. S3

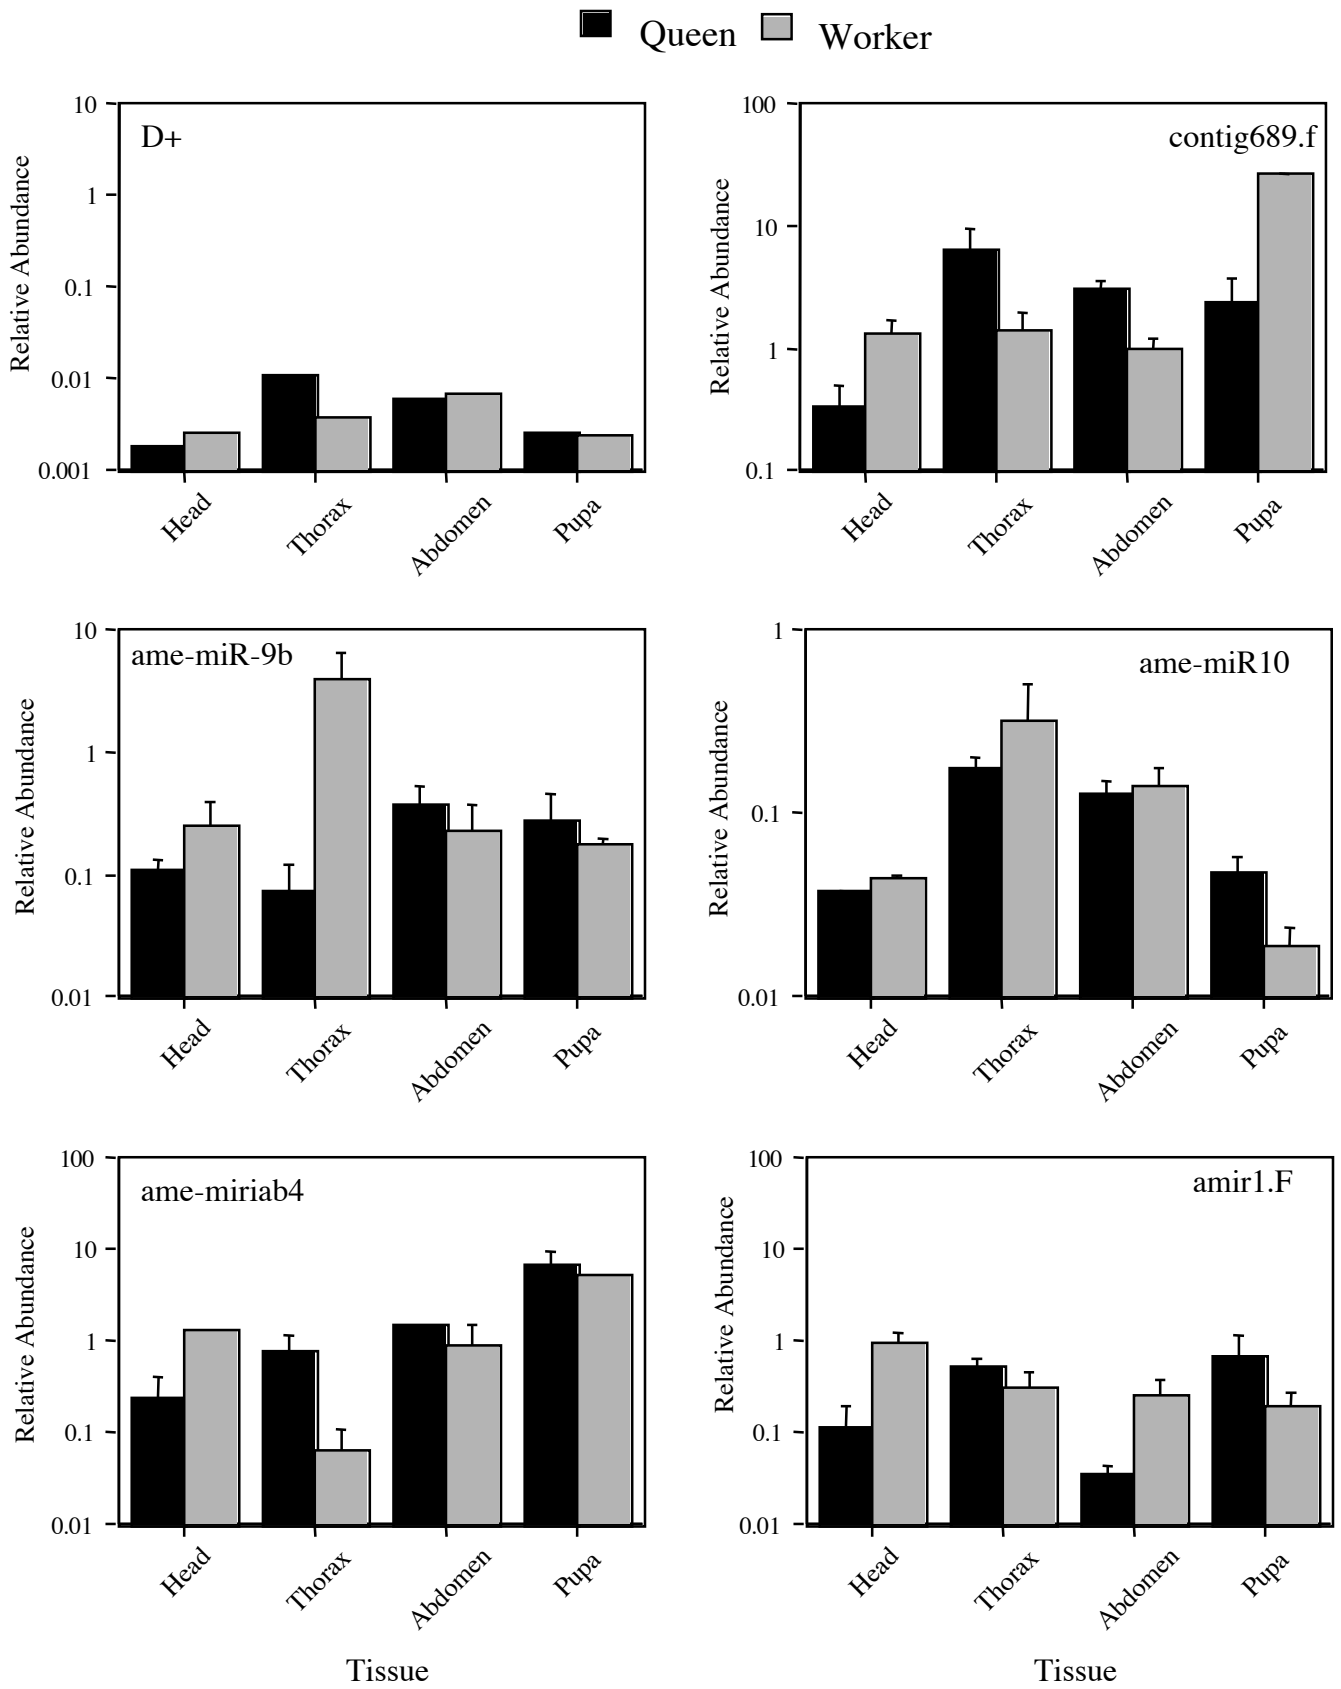

Fig. S1b

■ Queen    □ Worker

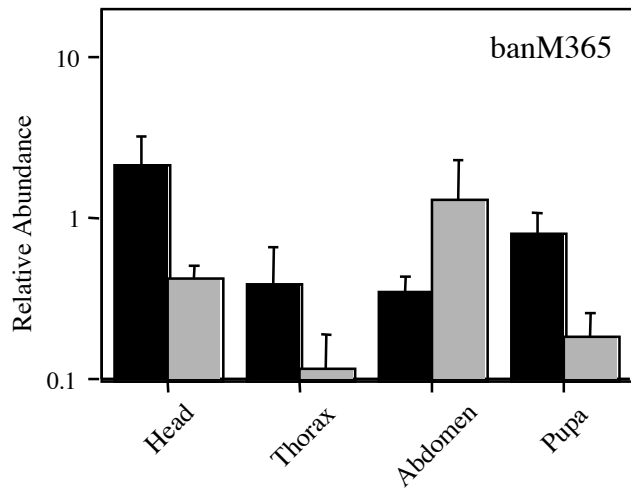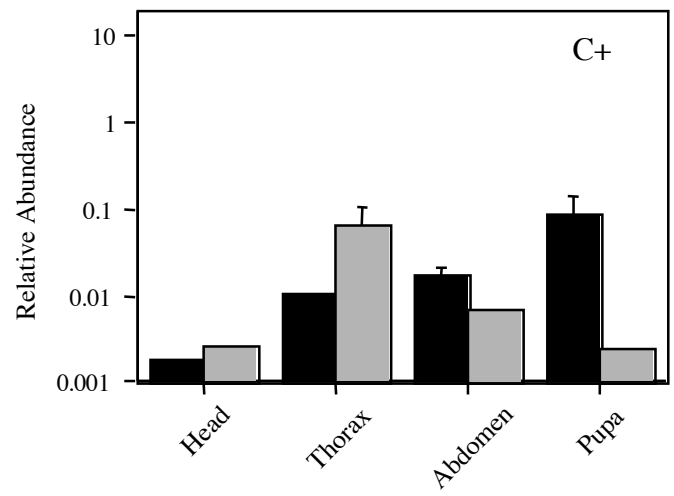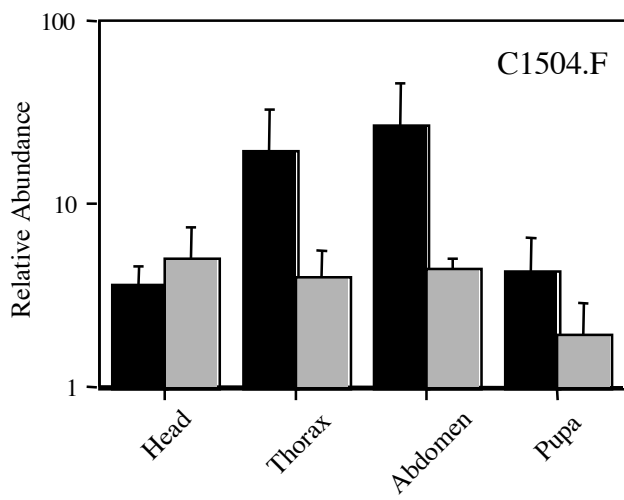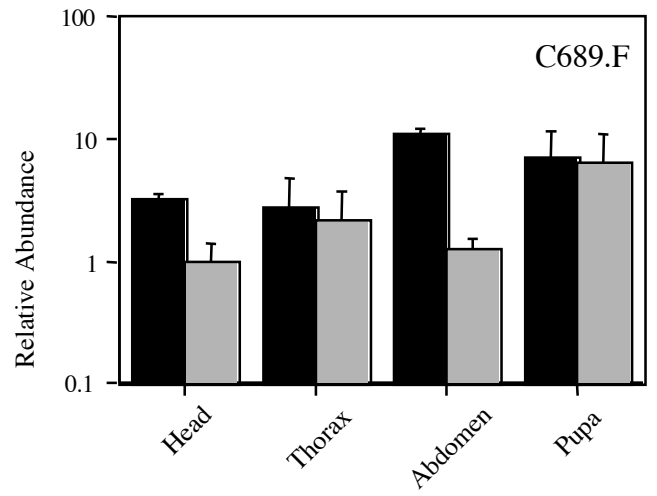

Tissue

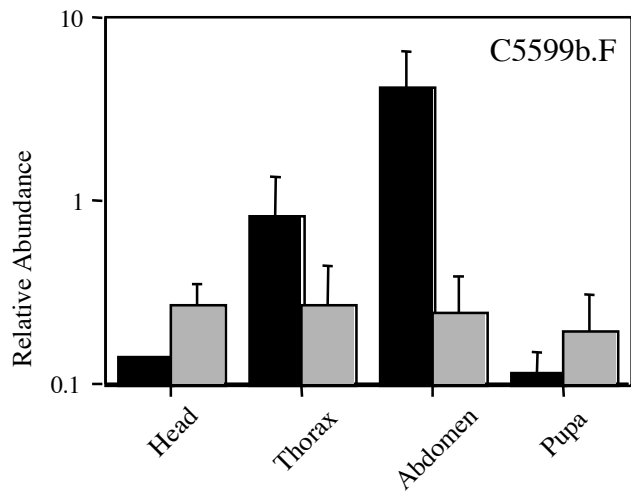

Tissue
